# Supplementary material for: Variability of River Runoff in Poland and Its Connection to Solar Variability
Source: MDPI journal article supplement (doi:10.3390/atmos14071184), 2023-07-22
Supplement: s1 [file s1]

Archive with 1 entries (1 files):
- atmosphere-2486916-supplementary.pdf
